# Supplementary material for: Heterolytic dihydrogen activation by B(C6F5)3 and carbonyl compounds
Source: Royal Society of Chemistry journal article supplement (doi:10.1039/c2dt12268e), 2012-01-01

## Heterolytic dihydrogen activation by $B(C_6F_5)_3$ and carbonyl compounds

Markus Lindqvist, Nina Sarnela, Victor Sumerin, Konstantin Chernichenko, Markku Leskelä and Timo Repo\*

Department of Chemistry, Laboratory of Inorganic Chemistry, P.O. Box 55, FIN-00014, University of Helsinki, Finland. Fax: +358 (9)19150198; Tel: +358 (9)19150194; E-mail: timo.repo@helsinki.

### Experimental details:

All experiments were performed using dual-manifold gas-inlet/vacuum line or in a glove box (MBraun Unilab) under argon atmosphere.  $H_2$  was purchased from AGA Ab and passed through a column of molecular sieves prior to use. All reagents were purchased from Sigma-Aldrich or Strem and purified by conventional methods. Solvents were dried according to published procedures and distilled under argon atmosphere. NMR experiments were performed on a Varian Mercury 300 MHz spectrometer. HRMS (ESI-TOF) mass spectra were recorded on Bruker micrOTOF mass spectrometer.

### General procedure:

A solution of  $B(C_6F_5)_3$  (51.2 mg, 0.1 mmol) and carbonyl compound (0.1 mmol) in 1 ml of toluene, toluene- $d_8$  or  $CD_2Cl_2$  was placed in a 25 ml vacuum-dried Schlenk tube equipped with a stirring bar, a teflon stopcock and a glass stopper (sealed with Glindemann sealing rings). The reaction mixture was freeze-thaw degassed and refilled with  $H_2$  or  $D_2$  (2 atm) and then stirred at 110 °C (temperature of oil bath) for 48 h. The solution was transferred to a NMR tube and analyzed. Before analyzing product **3**, it was exposed to moisture and heated at 60 °C in order to release it from its adducts with decomposition products of  $B(C_6F_5)_3$ . Toluene was evaporated at reduced pressure. The residue was dissolved in  $CDCl_3$  and investigated by  $^1H$ -NMR. Reported yields determined by NMR-spectroscopy.

The  $^1H$ ,  $^{13}C$  and  $^{19}F$  NMR spectroscopic data of the products and adducts were identical to values reported in literature.

**Benzyl alcohol**<sup>1</sup> (**3**):  $^1H$  NMR (300MHz,  $CDCl_3$ )  $\delta$  7.35-7.13 (m, 5H), 4.62 (s, 2H).

**(4-Methylphenyl)diphenylmethane**<sup>2</sup> (**6a**):  $^1H$  NMR (300MHz,  $CDCl_3$ )  $\delta$  7.33-6.95 (m, 14H), 5.50 (s, 1H), 2.31 (s, 3H).

**(2-Methylphenyl)diphenylmethane**<sup>2</sup> (**6b**):  $^1H$  NMR (300MHz,  $CDCl_3$ )  $\delta$  7.33-6.95 (m, 14H), 5.66 (s, 1H), 2.20 (s, 3H).

**Toluene**<sup>3</sup> (**9**):  $^1H$  NMR (300MHz,  $CD_2Cl_2$ )  $\delta$  7.32-7.05 (m, 5H), 2.34 (s, 3H).

**Diphenylmethane**<sup>4</sup> (**10**):  $^1H$  NMR (300MHz,  $CDCl_3$ )  $\delta$  7.34-7.13 (m, 10H), 3.97 (s, 2H).

1 A. R. Jagdale, A. S. Paraskar and A. Sudalai, *Synthesis*, 2008, 660.

2 J-Y. Yu and R. Kuwano, *Org. Lett.*, 2008, **10**, 973.

3 G. R. Fulmer, A. J. M. Miller, N. H. Sherden, H. E. Gottlieb, A. Nudelman, B. M. Stoltz, J. E. Bercaw and K. I. Goldberg, *Organometallics*, 2010, **29**, 2176.

4 E. Alacid and C. Nájera, *Org. Lett.*, 2008, **10**, 5011.

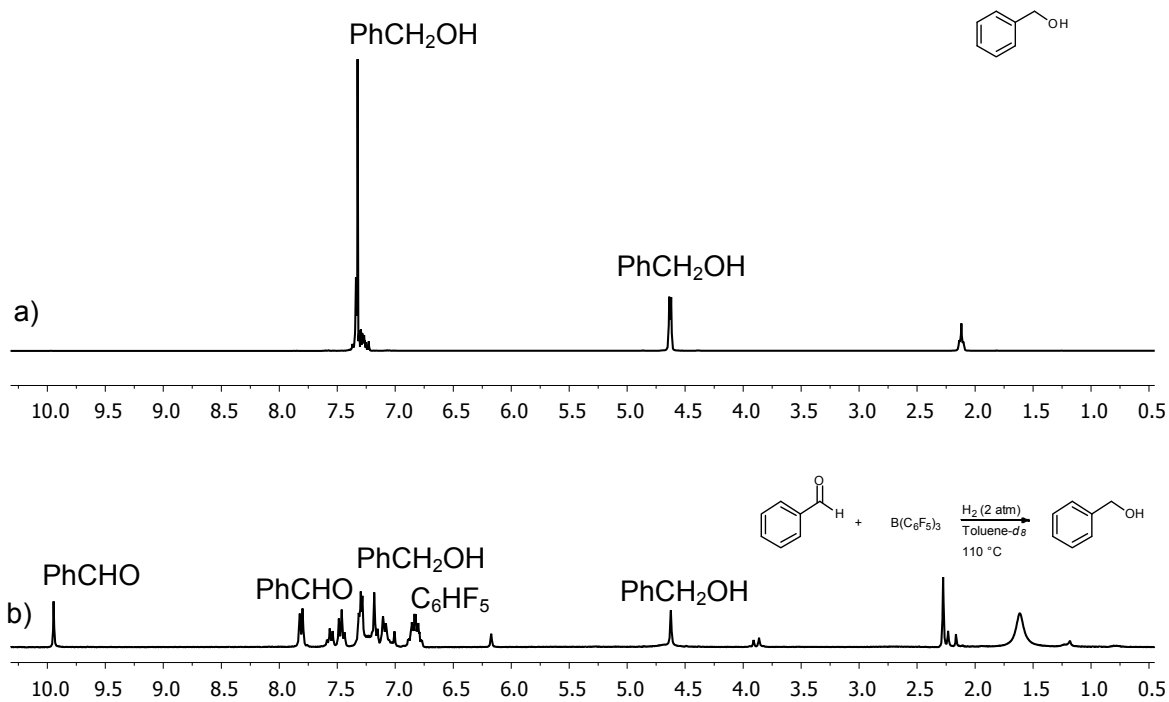

- a) Reference <sup>1</sup>H-NMR spectrum of benzyl alcohol in CDCl<sub>3</sub>.
- b) Hydrogenation of benzaldehyde in toluene-*d*<sub>8</sub> (<sup>1</sup>H-NMR, CDCl<sub>3</sub>, after aqueous work-up).

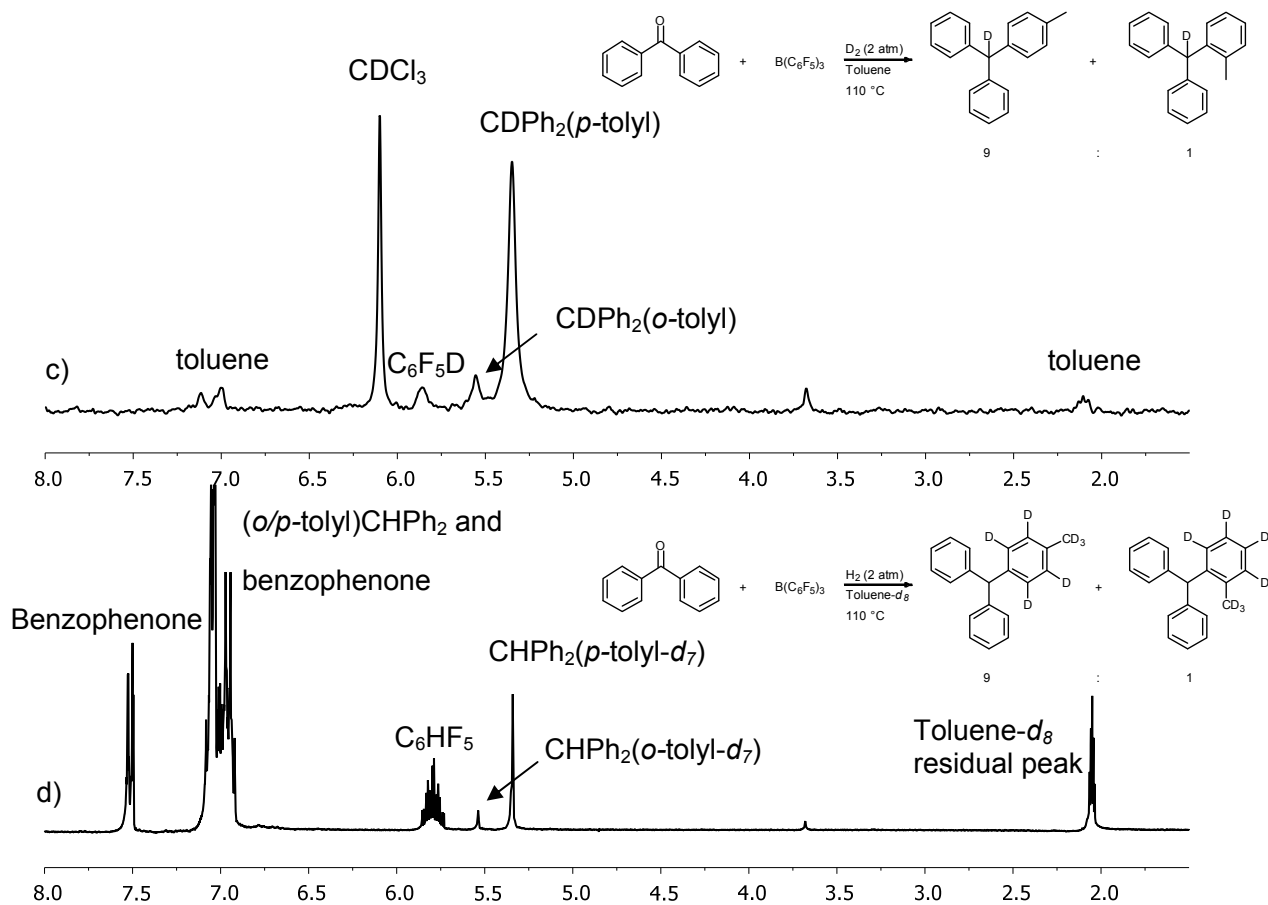

c) Reaction of benzophenone-B(C<sub>6</sub>F<sub>5</sub>)<sub>3</sub> with deuterium (<sup>2</sup>H-NMR, Toluene).

d) Reaction benzophenone-B(C<sub>6</sub>F<sub>5</sub>)<sub>3</sub> with H<sub>2</sub> (<sup>1</sup>H-NMR, Toluene-*d*<sub>8</sub>).

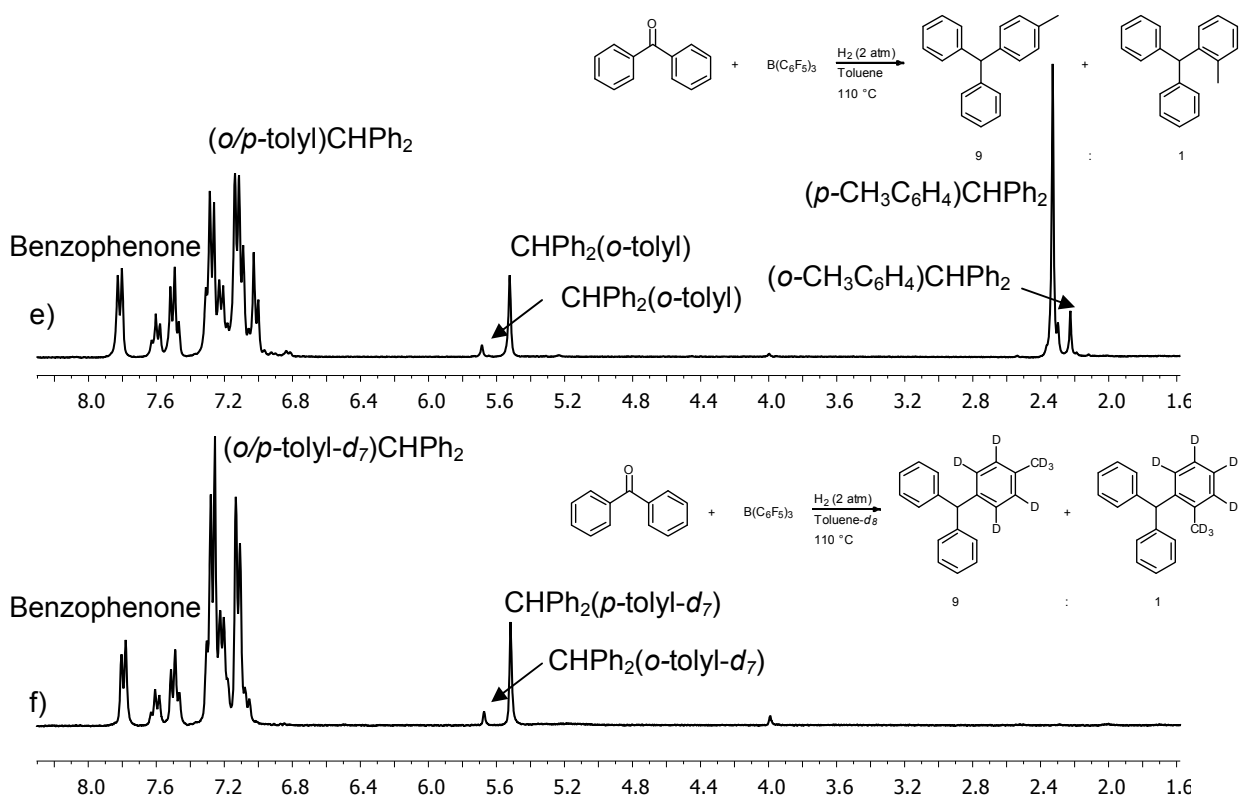

- e) Hydrogenation of benzophenone in toluene ( $^1\text{H-NMR}$ ,  $\text{CDCl}_3$ , after evaporation of all volatiles).
- f) Hydrogenation of benzophenone in toluene- $d_8$  ( $^1\text{H-NMR}$ ,  $\text{CDCl}_3$ , after evaporation of all volatiles).

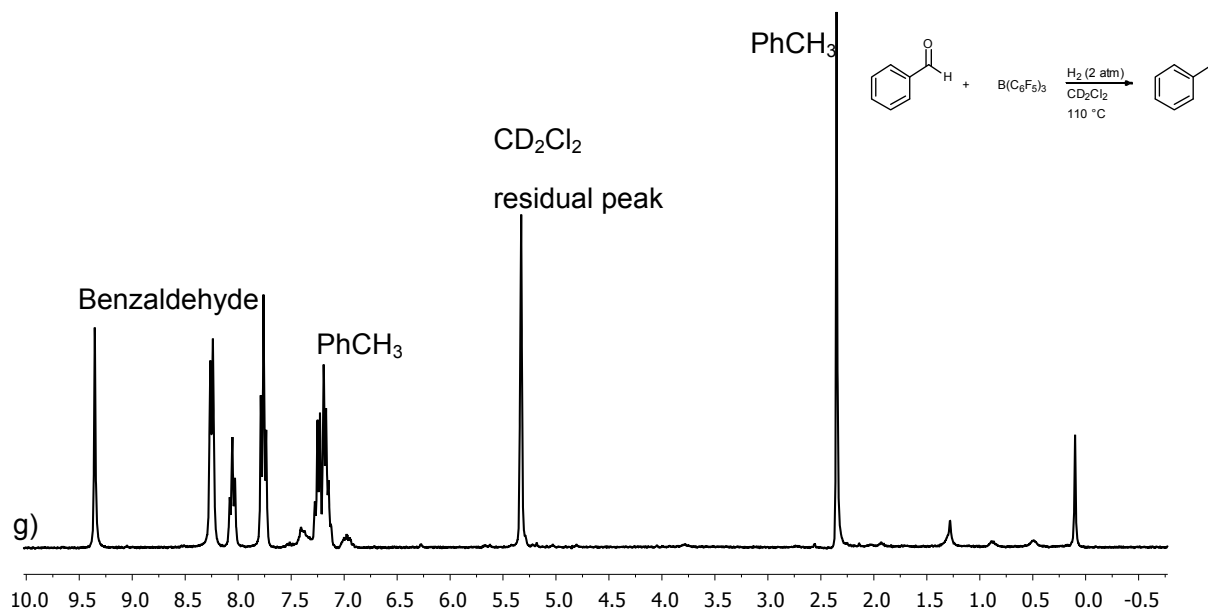

g) Hydrogenation of benzaldehyde in  $\text{CD}_2\text{Cl}_2$  ( $^1\text{H-NMR}$ ,  $\text{CD}_2\text{Cl}_2$ ).

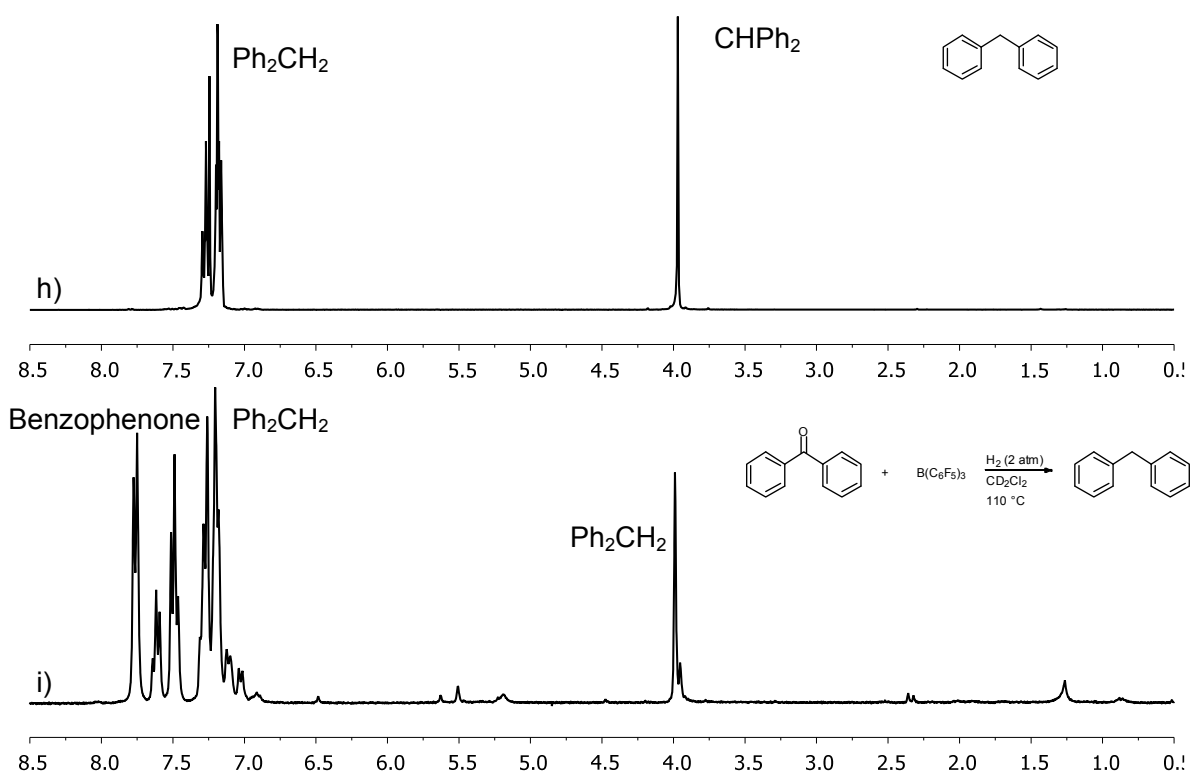

h) Reference  $^1\text{H-NMR}$  spectrum of diphenylmethane in  $\text{CDCl}_3$ .

i) Hydrogenation of benzophenone in  $\text{CD}_2\text{Cl}_2$  ( $^1\text{H-NMR}$ ,  $\text{CDCl}_3$ , after evaporation of all volatiles)

**Diphenylmethanol and tris(pentafluorophenyl)borane** give products of dismutation instantly upon mixing in  $\text{CDCl}_3$ . Tris(pentafluorophenyl)borane (25 mg, 0.05 mmol) was dissolved in  $\text{CDCl}_3$  (0.5 ml) and diphenylmethanol was added (9 mg, 0.1 mmol) and analyzed by NMR-spectroscopy.

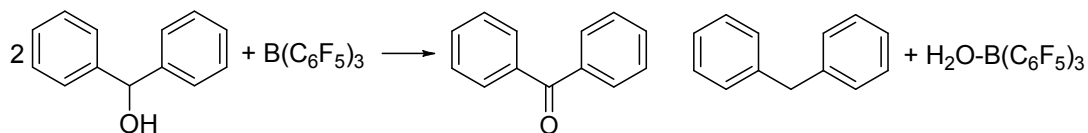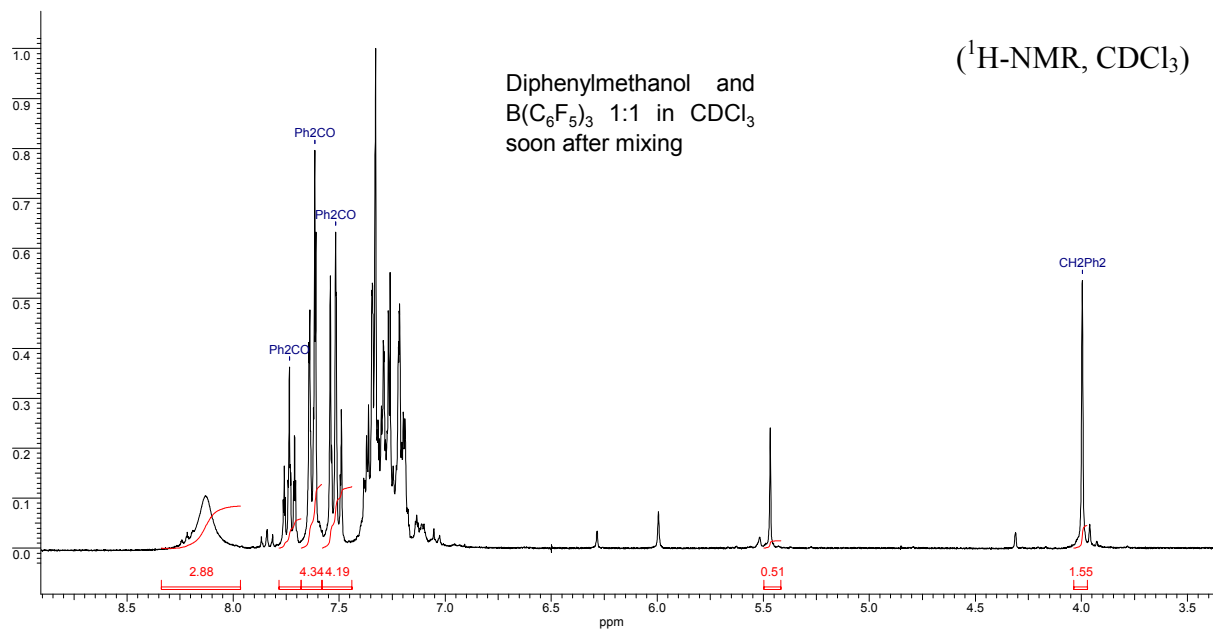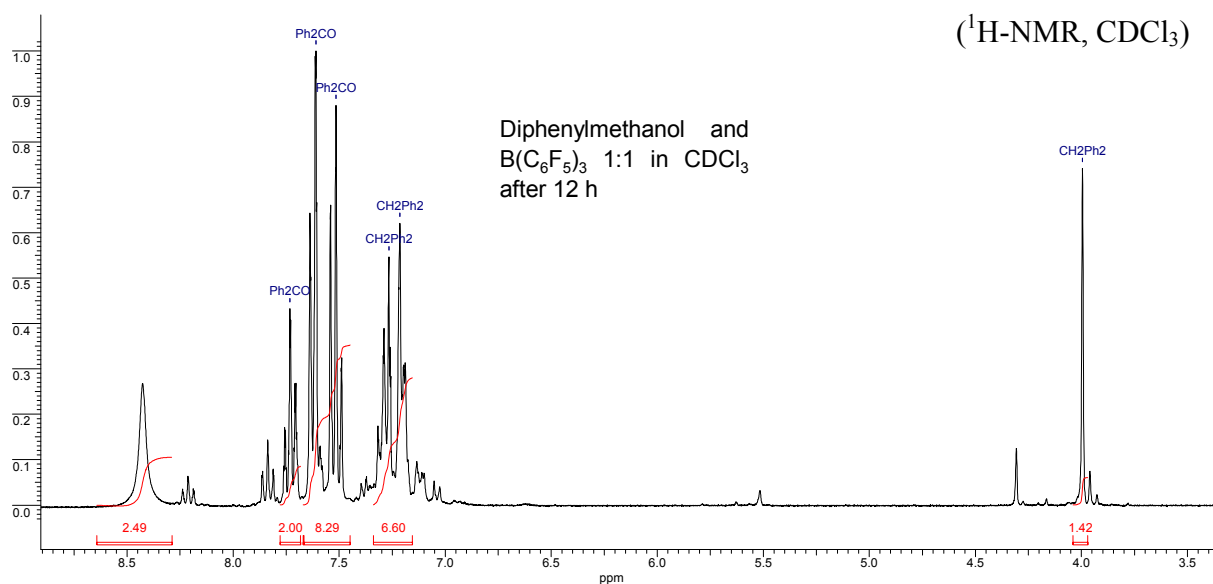

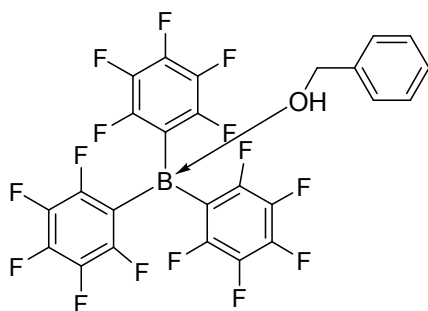

**Benzyl alcohol compound with  
tris(pentafluorophenyl)borane (1:1)**

Tris(pentafluorophenyl)borane (51 mg, 0.1 mmol) was dissolved in  $\text{CDCl}_3$  (0.5 ml) and benzyl alcohol was added (10.5 mg, 0.1 mmol) and analyzed by NMR-spectroscopy. Evaporation of the solution gave white solid. This was recrystallized from hexane (1 ml) to give. Storage in solution or heating during recrystallization promote formation of  $\text{B}(\text{C}_6\text{F}_5)_3\text{-H}_2\text{O}$  adduct evidently due to dehydration of benzyl alcohol.

$^1\text{H}$  NMR (300 MHz, CHLOROFORM-D)  $\delta$ , ppm: 4.93 (s, 2 H), 6.32 (m, 1 H) 7.30-7.43 (m, 2 H), 7.43-7.57 (m, 3 H)

$^{13}\text{C}$  NMR (75.43 MHz, CHLOROFORM-D)  $\delta$ , ppm: 73.58 (s), 129.38 (s), 129.83 (s), 130.90 (s), 131.38 (s), 135.38 (dm,  $J=230$  Hz), 141.22 (dm,  $J=250$  Hz), 147.76 (dm,  $J=240$  Hz),

$^{19}\text{F}$  NMR (282.21 MHz, CHLOROFORM-D)  $\delta$ , ppm: -134.1 (d,  $J=20$  Hz, 6F), -153.8 (s, 3F), -162.2 (m, 6F).

$^{10}\text{B}$  NMR (53.70 MHz, CHLOROFORM-D)  $\delta$ , ppm: 9.25 (br. s.)

ESI-MS-neg:  $[\text{C}_{25}\text{H}_7\text{BF}_{15}\text{O}]^-$ , calc.: 619.0360, found.: 619.0369.





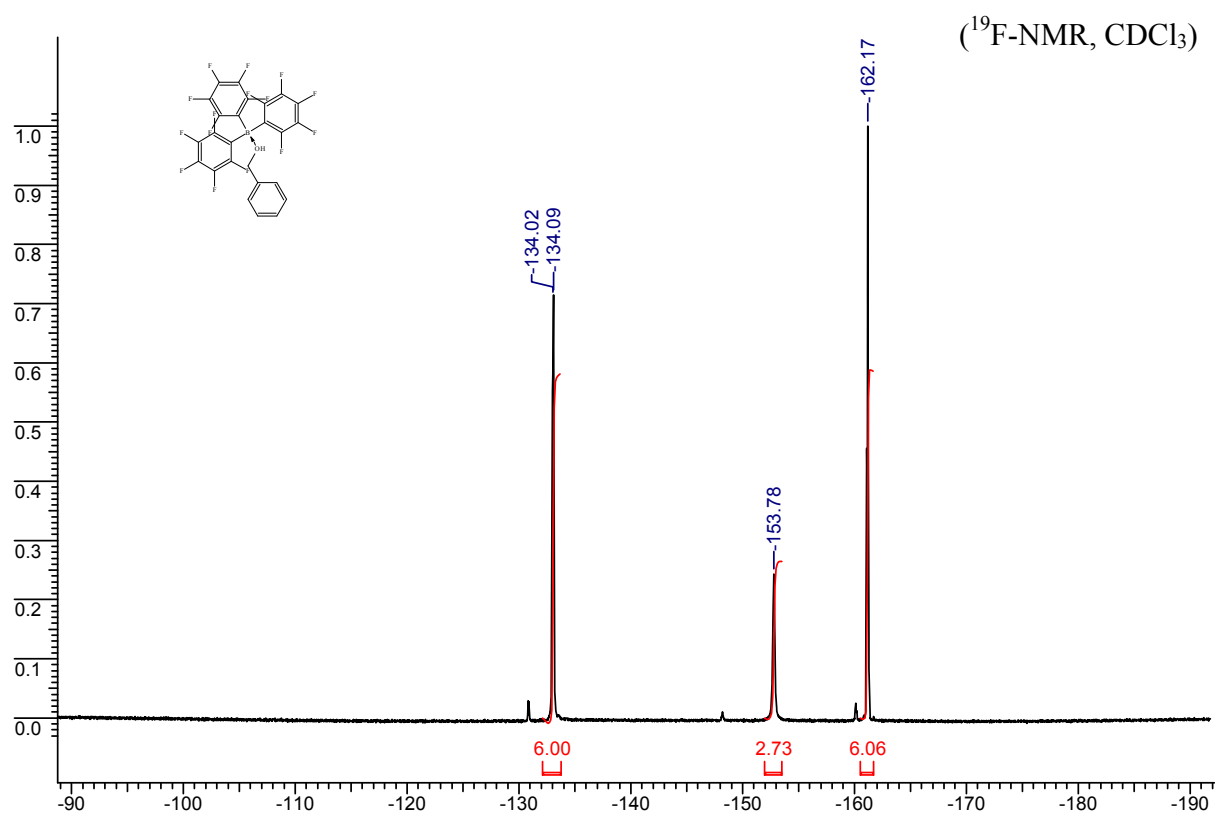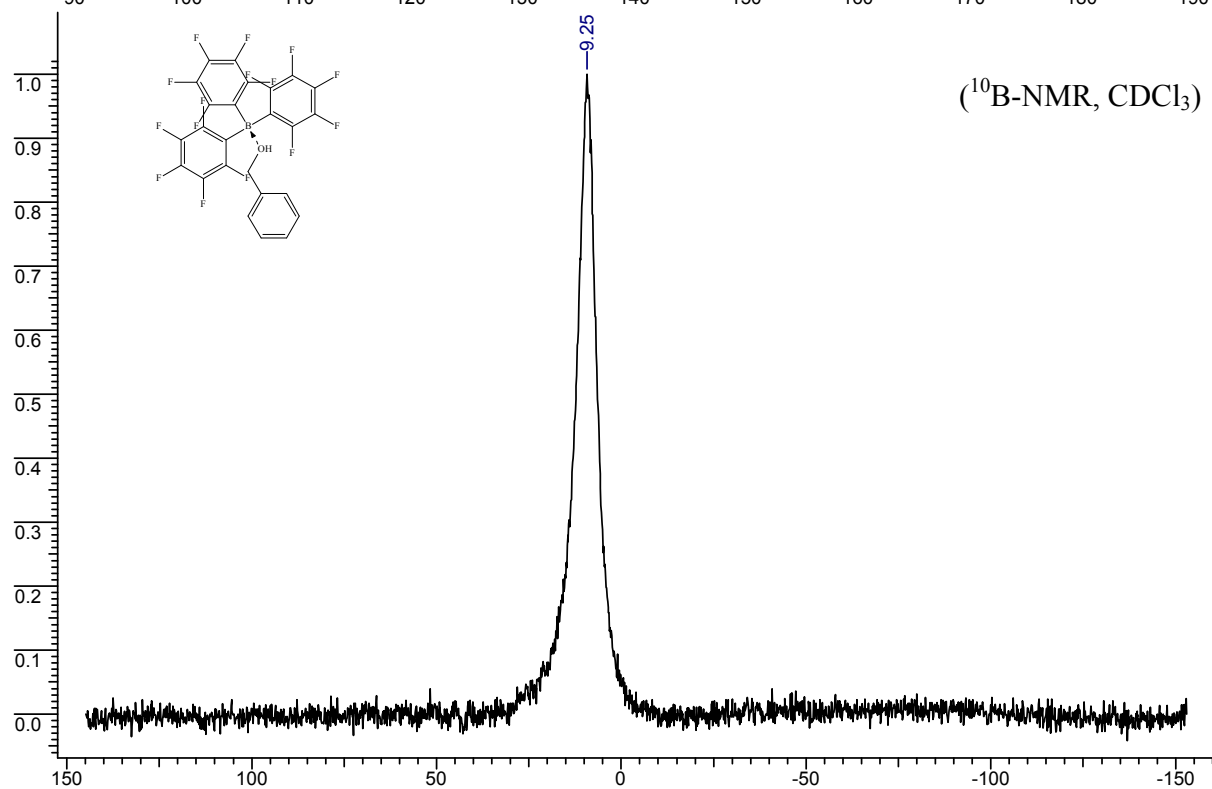

Supplement: c2dt12268e.pdf [file c2dt12268e.pdf]
